# Supplementary material for: Impact of cationic surfactant-induced DNA compaction on the characteristics of a minor groove bound flavonol
Source: Royal Society of Chemistry journal article supplement (doi:10.1039/d1sm01792f), 2022-01-01
Supplement: d1sm01792f1.pdf [file d1sm01792f1.pdf]

## Electronic Supplementary Information

### Impact of cationic surfactant-induced DNA compaction on the characteristics of the minor groove bound flavonol

Dipanjana Halder and Pradipta Purkayastha\*

Department of Chemical Sciences and Center for Advanced Functional Materials, Indian Institute of Science Education and Research Kolkata, Mohanpur 741246, WB, India.

## MATERIALS AND METHODS

### Materials

3-HF, CTAB, ct-DNA (molecular weight 8.4 MDa) and ethanol were purchased from Sigma-Aldrich, and the HEPES buffer was obtained from SRL, India. The solutions were prepared using ultrapure water from Merck, India.

### Preparation of solutions

7 mM 3-HF stock solution was prepared in spectroscopic grade ethanol. 20  $\mu$ M 3-HF, prepared in HEPES buffered solution (pH 7.4), was used for all the measurements. Concentration of ethanol in the final solution was less than 1%. 10 mM CTAB stock solution was prepared in water. 3 mM stock solution of ct-DNA was prepared in HEPES buffer (pH 7.4) and stored at 4°C. The concentration of ct-DNA was calculated in a spectrophotometer using  $\epsilon_{\text{DNA}} = 6600 \text{ mol}^{-1}\text{dm}^3\text{cm}^{-1}$  at 260 nm.

### Methods of measurements

The absorption spectra were recorded in a Hitachi U-2900 spectrophotometer. Steady state fluorescence and anisotropy measurements were done in a QM-40 spectrofluorimeter from PTI. The fluorescence anisotropy ( $r$ ) is defined as:

$$r = \frac{(I_{VV} - GI_{VH})}{(I_{VV} + 2GI_{VH})}$$

where,  $I_{VV}$  and  $I_{VH}$  are the emission intensities of the excitation polarizer oriented vertically and emission polarizer oriented vertically and horizontally, respectively. The G factor is defined as:

$$G = \frac{I_{HV}}{I_{HH}}$$

where,  $I_{HV}$  and  $I_{HH}$  intensities refer to the vertical and horizontal positions of the emissions polarizer keeping the excitation polarizer horizontal.

The CD spectra were recorded in a JASCO J-815 spectrometer using a quartz cuvette with 1 mm path length in the wave length range 200-500 nm. The CD profiles were obtained employing a scan rate of 100 nm/min against a corrected baseline with the buffer solution.

A ZEISS (Supra) instrument was used for taking the scanning electron microscopy (SEM) images. The fluorescence microscopic images were taken from a motorized inverted research microscope (Olympus IX81) with fluorescence and DIC optics. 460-495 nm lasers were used for excitation and emission the between 510-550 nm was collected.

The time-resolved fluorescence decay data were obtained using the time correlated single photon counting (TCSPC) method. The fluorescence decay and the anisotropy data were measured from a Horiba Jobin Yvon time-resolved spectrometer with a 375 nm diode laser excitation (temporal resolution <70 ps). The raw data of fluorescence decay were fitted by a non-linear least square iteration procedure using IBH DAS6 (version 2.2) software. The time-resolve fluorescence anisotropy,  $r(t)$  could be determined by using the same equation used for steady state anisotropy. The change in anisotropy with the time is given by:

$$r(t) = r_0 e^{(-t/\tau_r)}$$

where,  $r_0$  is the initial anisotropy and the rotational correlation time was denoted by  $\tau_r$ .

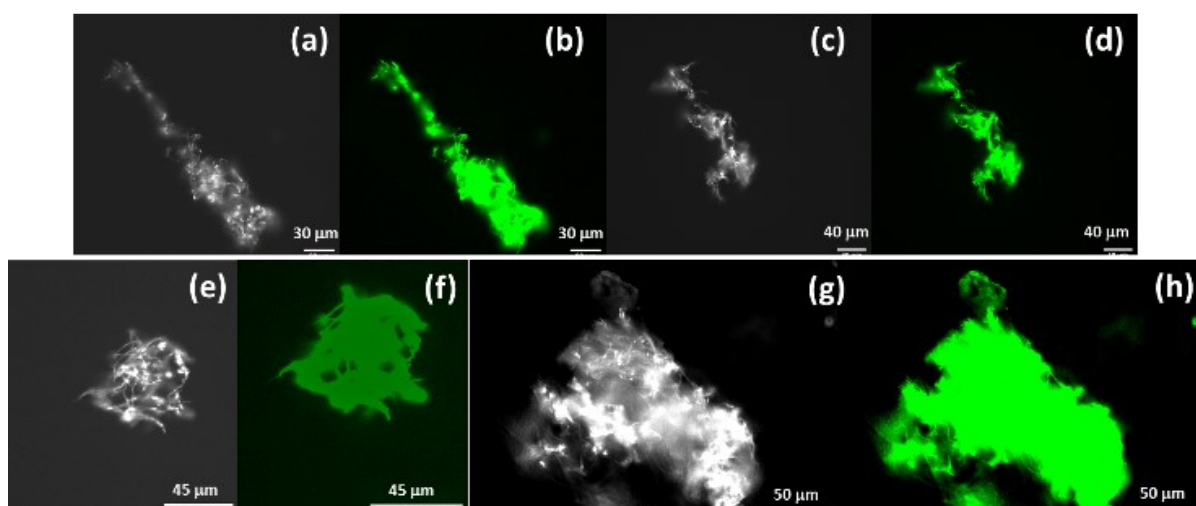

**Fig. S1.** Fluorescence microscopy images at the different stages of application of CTAB to the ct-DNA-bound 3-HF: (a, b) 0, (c, d) 30, (e, f) 150 and (g, h) 400  $\mu\text{M}$  in aqueous buffered medium (pH 7.4). We have presented the non-colored images along with the colored ones for clarity.

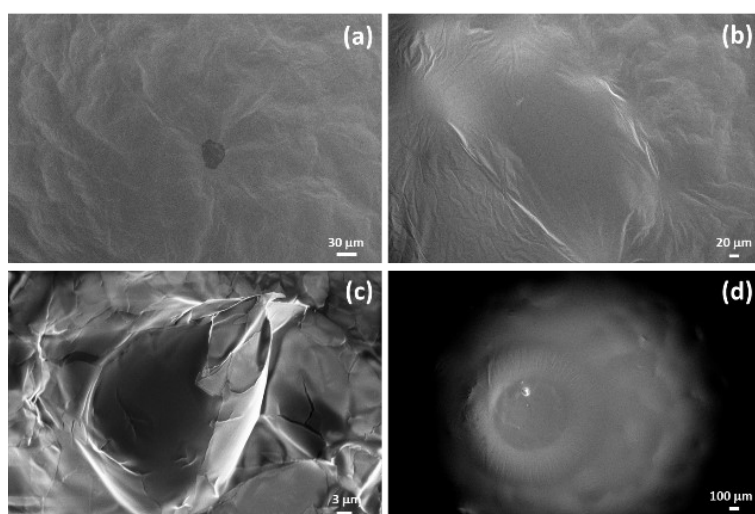

**Fig. S2.** SEM images at the different stages of application of CTAB to the ct-DNA: (a) 0, (b) 30, (c) 150 and (d) 400  $\mu\text{M}$  in aqueous buffered medium (pH 7.4).

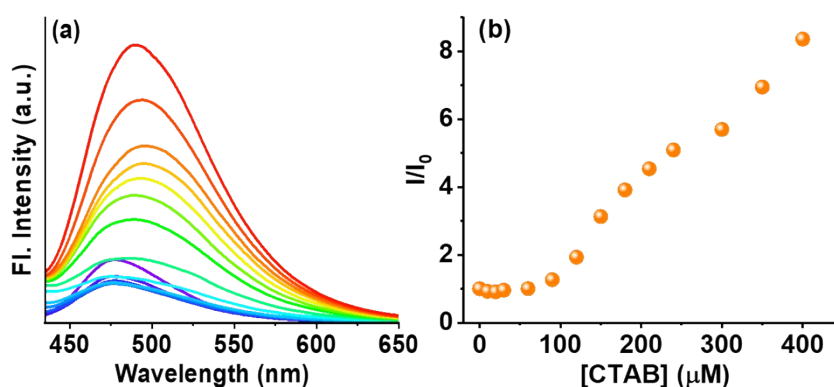

**Fig. S3.** (a) Fluorescence spectra of 3-HF bound to the minor groove of ct-DNA interacting with different concentrations of CTAB (0-400  $\mu\text{M}$ ), and (b) the relative change in the emission intensity (monitored at 510 nm) due to the interactions in neutral aqueous buffer medium (pH 7.4) at 22  $^{\circ}\text{C}$ . The samples were excited at 410 nm.

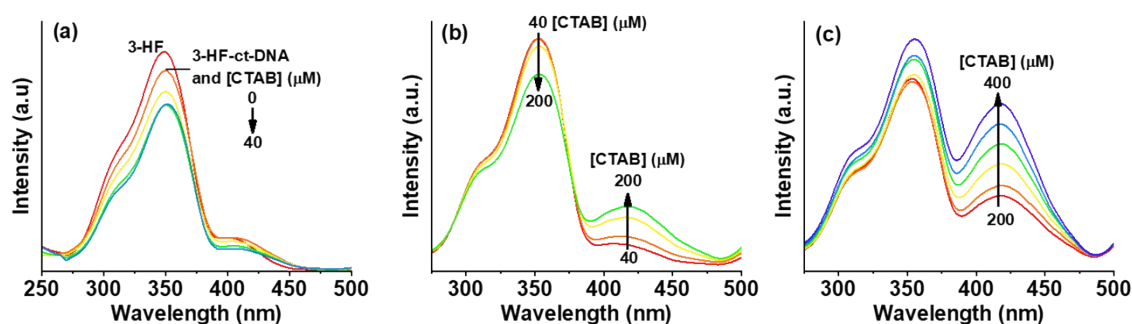

**Fig. S4.** The excitation spectra of 3-HF bound to ct-DNA on addition of various concentrations of CTAB (a) 0 to 40, (b) 40-200 and (c) 200-400  $\mu\text{M}$  CTAB in aqueous buffer with pH 7.4 at 22  $^{\circ}\text{C}$ .

**Table S1.** Time-resolved fluorescence decay data of 3-HF on interaction with various concentrations of CTAB in aqueous medium. The samples were excited at 375 nm and the 510 nm emission was monitored. The  $\tau$ 's and the  $\alpha$ 's are the lifetimes and the percentage contributions to the fluorescence decay, respectively and the  $\chi^2$  values present the goodness of the fits. The data are within acceptable error limits.

| [CTAB] ( $\mu\text{M}$ ) | $\tau_1$ (ps) | $\alpha_1$ | $\tau_2$ (ps) | $\alpha_2$ | $\chi^2$ |
|--------------------------|---------------|------------|---------------|------------|----------|
| 0                        | 178           | 86         | 860           | 14         | 1.24     |
| 30                       | 232           | 74         | 1240          | 26         | 1.21     |
| 150                      | 229           | 72         | 1150          | 28         | 1.33     |
| 400                      | 704           | 55         | 188           | 45         | 1.43     |

**Table S2.** Time-resolved fluorescence decay data of ct-DNA-bound 3-HF on interaction with various concentrations of CTAB in aqueous medium. The samples were excited at 375 nm and the 510 nm emission was monitored. The  $\tau$ 's and the  $\alpha$ 's are the lifetimes and the percentage contributions to the fluorescence decay, respectively and the  $\chi^2$  values present the goodness of the fits. The data are within acceptable error limits.

| [CTAB] ( $\mu\text{M}$ ) | $\tau_1$ (ps) | $\alpha_1$ | $\tau_2$ (ps) | $\alpha_2$ | $\tau_3$ (ps) | $\alpha_3$ | $\chi^2$ |
|--------------------------|---------------|------------|---------------|------------|---------------|------------|----------|
| 0                        | 9120          | 46         | 256           | 37         | 1230          | 17         | 1.2      |
| 30                       | 9040          | 39         | 253           | 41         | 1110          | 20         | 1.18     |
| 150                      | 1110          | 59         | 428           | 37         | 80            | 4          | 1.16     |
